# Supplementary material for: Partition constants of alcohols and surfactants in mixed alcohol/10-carbon dimeric amphiphile aggregates from NMR-diffusion experiments
Source: Royal Society of Chemistry journal article supplement (doi:10.1039/d5cp01361e), 2025-01-01
Supplement: d5cp01361e1.pdf [file d5cp01361e1.pdf]

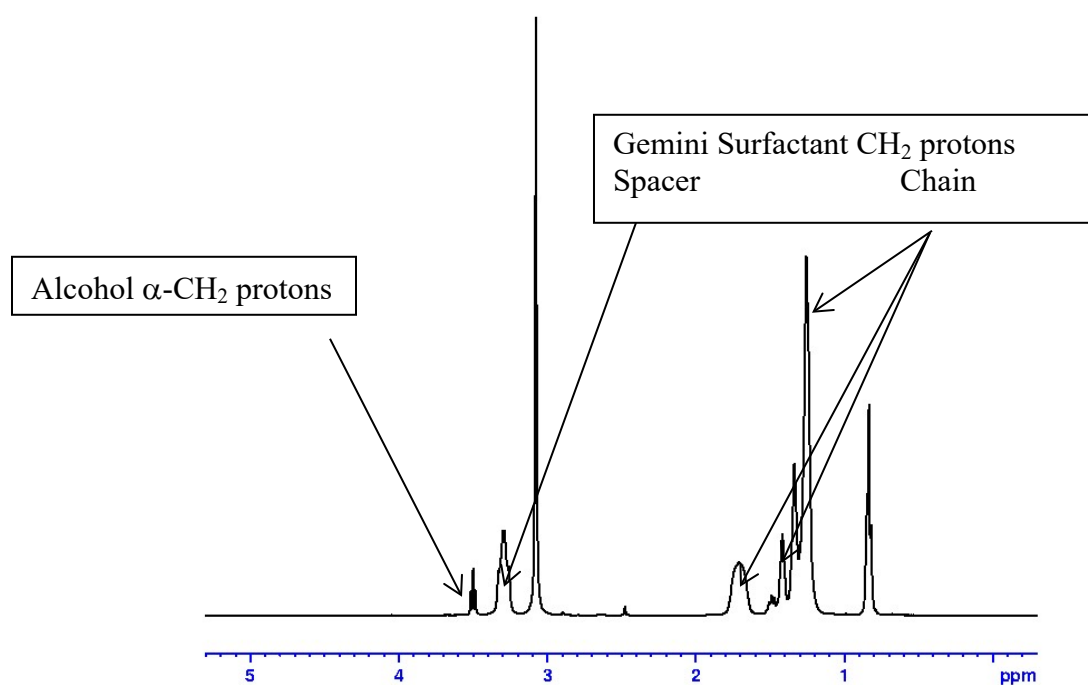

*Figure S1 –  $^1\text{H}$  NMR spectrum for the system 6  $\mu\text{L}$  C<sub>4</sub>OH in 50 mg/mL 10-6-10 Gemini surfactant. The  $\alpha$ -CH<sub>2</sub> protons used to determine the alcohol diffusion coefficient in the aggregated system are indicated on the Figure.*

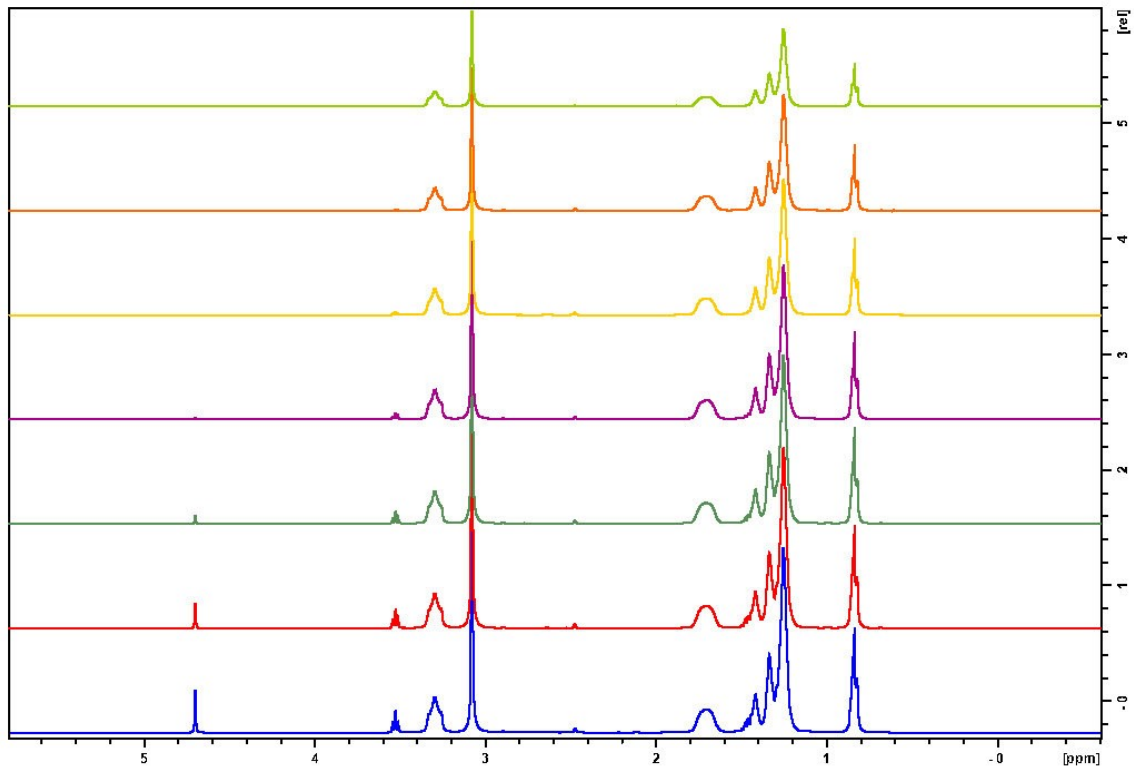

Figure S2 – Stacked plot for the system 6  $\mu\text{L}$  C<sub>4</sub>OH in 50 mg/mL 10-6-10 gemini surfactant. The variation in the D values of the components in the mixture are readily apparent from the differential attenuation of the water peak (4.70 ppm), the alcohol protons (the  $\alpha\text{-CH}_2$  protons at  $\sim 3.5$  ppm), and surfactant resonances.
